# Supplementary material for: Biological Evaluation and Docking Analysis of Daturaolone as Potential Cyclooxygenase Inhibitor
Source: Hindawi journal article supplement (doi:10.1155/2016/4098686), 2016-01-01

File: PN  
Sample: ABDUR RAUF / DR.BINA S.SIDDIQUI  
Instrument: JEOL JMS-600H  
Inlet: Direct Probe

Date Run: 08-21-2013 (Time Run: 10:20:33)

Run By: HEJ (CCBS)

Ionization mode: EI+

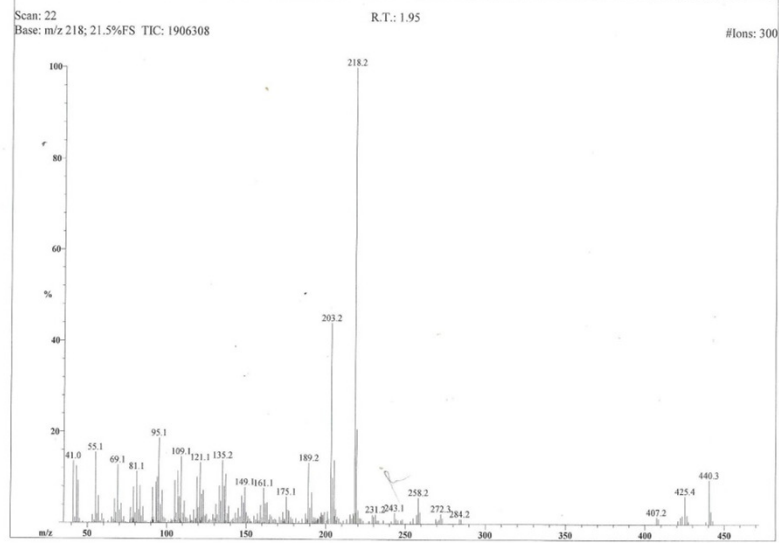

ABDUL RAUF/DR.BINA/P.N/CDCL3  
 ICCBS/U.O.R/

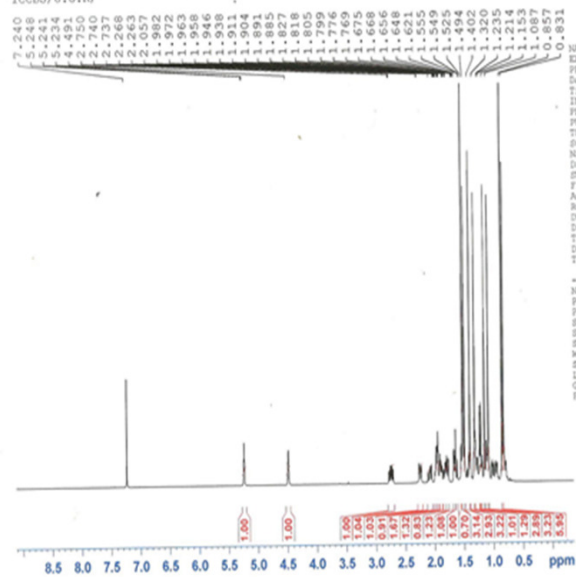

NAME au119-13  
 EXPNO 3  
 PROCNO 1  
 Date\_ 20130819  
 Time 14.30  
 INSTRUM spect  
 PROBRD 5 mm PABBI 1H/  
 PULPROG zg30  
 TS 32768  
 SOLVENT CDCl3  
 NS 128  
 DS 8  
 DMN 10000.000 Hz  
 FIDRES 0.305174 Hz  
 AQ 1.4385000 sec  
 RG 322.5  
 SW 50.000 ussec  
 TE 6.50 ussec  
 TR 302.2 K  
 SI 1.50000000 sec  
 TD 1

----- CHANNEL f1 -----  
 NUCL 1H  
 P1 7.00 ussec  
 PL1 5.00 dB  
 SFO1 500.2340018 MHz  
 SI 32768  
 SF 500.2300193 MHz  
 MCH DM  
 SZB 0  
 LB 0.30 Hz  
 GB 0  
 PC 1.40

AVANCE AV500  
 LAE HCN 90

ABDUR RAUF/DR.BINA/PN/CDCL3  
BB

216.68  
216.63

144.52

121.81

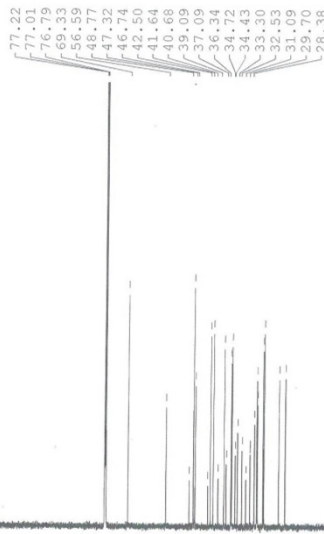

AVANCE AV 600  
LAB. No. 100  
LG. MMR

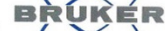

NAME au026-13  
EXPNO 6  
PROCNO 1  
Date\_ 20130827  
Time 12.17  
INSTRUM spect  
PROBHD 5 mm PATAI 1H-  
PULPROG zgpg30  
TD 65536  
SOLVENT CDCL3  
NS 20480  
DS 4  
SFR 39971.223 Hz  
FIDRES 0.248877 Hz  
AQ 0.9110143 sec  
RG 32768  
IN 13.930 usec  
DE 6.53 usec  
TE 299.2 K  
D1 2.09000000 sec  
D11 0.03000000 sec  
T10 20  
----- CHANNEL f1 -----  
NUC1 13C  
P1 11.60 usec  
PL1 -4.00 dB  
PL1W 135.65962275 W  
SFO1 100.6281149 MHz  
----- CHANNEL f2 -----  
CPRPGR2 waltz16  
NUC2 1H  
PCPD2 100.00 usec  
PL2 0.00 dB  
PL2W 22.50 dB  
PL3 28.00 dB  
PL3W 11.56894113 W  
PL4W 0.38192119 W  
PL5W 0.02309022 W  
SFO2 600.0336002 MHz  
SI 32768  
SF 150.8776640 MHz  
WDW EM  
SSB 0  
LB 1.00 Hz  
GB 0  
PC 1.00

ABDUR RAUF/DR.BINA/PN/CDCL3  
dept135

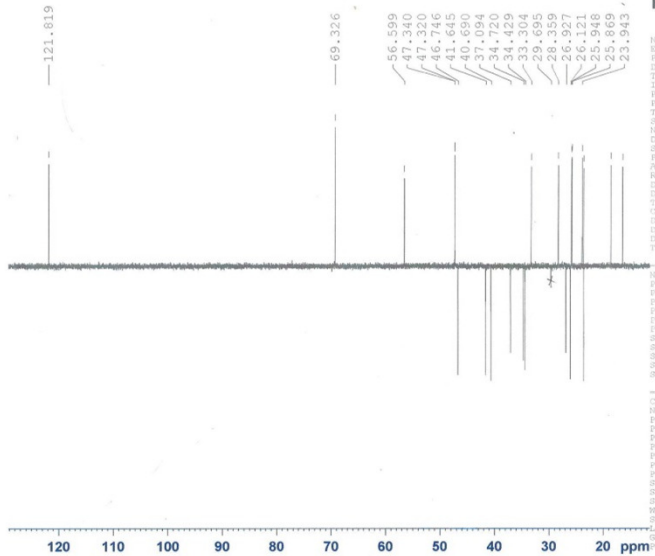

AVANCE AV 600  
LAB. No. 108  
1984  
**BRUKER**

NAME  
EXPER 0025-11  
PROBHD 1  
Date 20130828  
Time 4:57  
INSTRUM spect  
PROBHD 5 mm PAK1 1H-  
PULPROG deptq135  
TD 32768  
SOLVENT CDCL3  
NS 7197  
DS 2  
SWH 30303.031 Hz  
FIDRES 0.324775 Hz  
AQ 0.1407285 sec  
RG 32768  
SQ 15.500 usec  
DE 6.50 usec  
TE 303.1 K  
CHARGE 145.0000000  
SI 1.0000000 sec  
SC 0.0014828 sec  
DLE 0.00002000 sec  
DSO 16

CHANNEL F1  
NUC1 13C  
P1 11.00 usec  
PL1 2000.00 usec  
PLD 120.00 dB  
PL2 4.00 dB  
PL3 0.0000000 H  
PL4 150.6582278 H  
PL5 150.8927518 MHz  
SFO1 1.99 dB  
SFO2 Ccp60comp-1  
SFO3 0.500  
SFO4 0.00 Hz

CHANNEL F2  
CPDPR2 wait:16  
NUC2 1H  
P2 7.40 usec  
PL2 14.00 usec  
PLD 100.00 usec  
PL3 0.00 dB  
PL4 22.50 dB  
PL5 14.58894112 H  
PL6 0.0015218 H  
SFO1 600.0330002 MHz  
SFO2 150.8776640 MHz  
SFO3 0.50 Hz  
SFO4 1.40

ABDUR RAUF/DR.BINA/PN/CDCL3  
hmbc

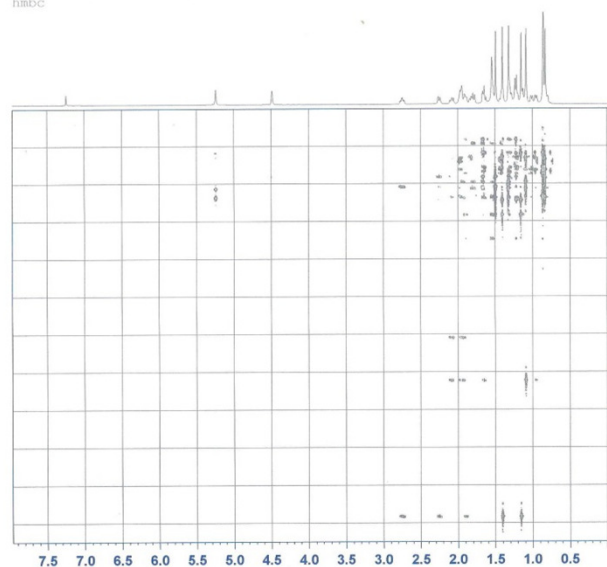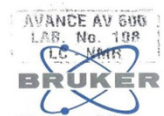

```
NAME: 09270711
EXPNO: 1
PROCNO: 10130011
Date_
Time: 0.11
INSTRUM: spect
PROBHD: 5 mm PATEL 1H-
P1: 140.000000 sec
PC: 140.000000 sec
RG: 656
AQ: 0.031250 sec
RG2: 656
SI: 32768
SF: 600.131340 MHz
WDW: EM
SSB: 0
LB: 0.300000 MHz
GB: 0
PCYCLE: 1
===== CHANNEL f1 =====
NUC1: 13C
P1: 7.00 sec
PC: 15.00 sec
PC2: 1.00 sec
PL1W: 14.00000112 W
PL2W: 100.00000112 W
===== CHANNEL f2 =====
NUC2: 1H
P1: 11.00 sec
PC: 4.00 sec
PL1W: 170.00000112 W
PL2W: 150.00000112 W
===== CHANNEL f3 =====
NUC3: 13C
P1: 0.10000000 sec
PC: 0.10000000 sec
PC2: 0.10000000 sec
PL1W: 0.10000000 W
PL2W: 0.10000000 W
===== CHANNEL f4 =====
NUC4: 1H
P1: 0.02 sec
PC: 0.02 sec
PC2: 0.02 sec
PL1W: 0.02 W
PL2W: 0.02 W
```

ABDUR RAUF/DR. HINA/PN/CDCL3  
hsqc

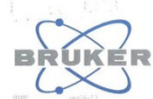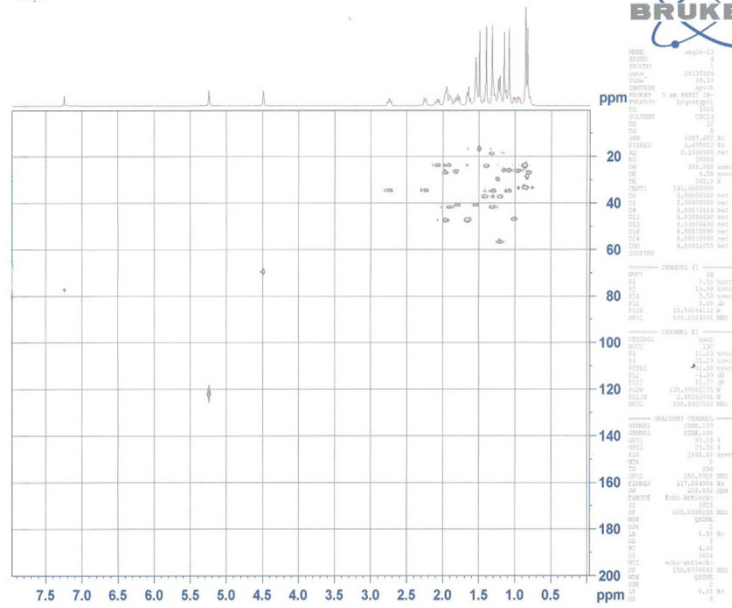

NAME: my20-12  
EXPNO: 1  
PROCNO: 1  
PROCPS: 1638024  
DATE\_01: 20.14  
DATE\_02: 20.14  
INSTRUM: spect  
PROBHD: 5mm HPEC  
PULPROG: zgpg30  
AQ: 0.164  
RG: 321  
SD: 321  
WDW: EM  
SSB: 0  
LB: 4000.00 Hz  
GB: 0  
PC: 4.0000000000000000  
CT: 0.10000000000000000  
CB: 0.00000000000000000  
CC: 0.00000000000000000  
CD: 0.00000000000000000  
CE: 0.00000000000000000  
CF: 0.00000000000000000  
CG: 0.00000000000000000  
CH: 0.00000000000000000  
CI: 0.00000000000000000  
CJ: 0.00000000000000000  
CK: 0.00000000000000000  
CL: 0.00000000000000000  
CM: 0.00000000000000000  
CN: 0.00000000000000000  
CO: 0.00000000000000000  
CP: 0.00000000000000000  
CQ: 0.00000000000000000  
CR: 0.00000000000000000  
CS: 0.00000000000000000  
CT: 0.00000000000000000  
CU: 0.00000000000000000  
CV: 0.00000000000000000  
CW: 0.00000000000000000  
CX: 0.00000000000000000  
CY: 0.00000000000000000  
CZ: 0.00000000000000000  
D0: 0.00000000000000000  
D1: 0.00000000000000000  
D2: 0.00000000000000000  
D3: 0.00000000000000000  
D4: 0.00000000000000000  
D5: 0.00000000000000000  
D6: 0.00000000000000000  
D7: 0.00000000000000000  
D8: 0.00000000000000000  
D9: 0.00000000000000000  
D0: 0.00000000000000000  
D1: 0.00000000000000000  
D2: 0.00000000000000000  
D3: 0.00000000000000000  
D4: 0.00000000000000000  
D5: 0.00000000000000000  
D6: 0.00000000000000000  
D7: 0.00000000000000000  
D8: 0.00000000000000000  
D9: 0.00000000000000000  
E0: 0.00000000000000000  
E1: 0.00000000000000000  
E2: 0.00000000000000000  
E3: 0.00000000000000000  
E4: 0.00000000000000000  
E5: 0.00000000000000000  
E6: 0.00000000000000000  
E7: 0.00000000000000000  
E8: 0.00000000000000000  
E9: 0.00000000000000000  
F0: 0.00000000000000000  
F1: 0.00000000000000000  
F2: 0.00000000000000000  
F3: 0.00000000000000000  
F4: 0.00000000000000000  
F5: 0.00000000000000000  
F6: 0.00000000000000000  
F7: 0.00000000000000000  
F8: 0.00000000000000000  
F9: 0.00000000000000000  
G0: 0.00000000000000000  
G1: 0.00000000000000000  
G2: 0.00000000000000000  
G3: 0.00000000000000000  
G4: 0.00000000000000000  
G5: 0.00000000000000000  
G6: 0.00000000000000000  
G7: 0.00000000000000000  
G8: 0.00000000000000000  
G9: 0.00000000000000000  
H0: 0.00000000000000000  
H1: 0.00000000000000000  
H2: 0.00000000000000000  
H3: 0.00000000000000000  
H4: 0.00000000000000000  
H5: 0.00000000000000000  
H6: 0.00000000000000000  
H7: 0.00000000000000000  
H8: 0.00000000000000000  
H9: 0.00000000000000000  
I0: 0.00000000000000000  
I1: 0.00000000000000000  
I2: 0.00000000000000000  
I3: 0.00000000000000000  
I4: 0.00000000000000000  
I5: 0.00000000000000000  
I6: 0.00000000000000000  
I7: 0.00000000000000000  
I8: 0.00000000000000000  
I9: 0.00000000000000000  
J0: 0.00000000000000000  
J1: 0.00000000000000000  
J2: 0.00000000000000000  
J3: 0.00000000000000000  
J4: 0.00000000000000000  
J5: 0.00000000000000000  
J6: 0.00000000000000000  
J7: 0.00000000000000000  
J8: 0.00000000000000000  
J9: 0.00000000000000000  
K0: 0.00000000000000000  
K1: 0.00000000000000000  
K2: 0.00000000000000000  
K3: 0.00000000000000000  
K4: 0.00000000000000000  
K5: 0.00000000000000000  
K6: 0.00000000000000000  
K7: 0.00000000000000000  
K8: 0.00000000000000000  
K9: 0.00000000000000000  
L0: 0.00000000000000000  
L1: 0.00000000000000000  
L2: 0.00000000000000000  
L3: 0.00000000000000000  
L4: 0.00000000000000000  
L5: 0.00000000000000000  
L6: 0.00000000000000000  
L7: 0.00000000000000000  
L8: 0.00000000000000000  
L9: 0.00000000000000000  
M0: 0.00000000000000000  
M1: 0.00000000000000000  
M2: 0.00000000000000000  
M3: 0.00000000000000000  
M4: 0.00000000000000000  
M5: 0.00000000000000000  
M6: 0.00000000000000000  
M7: 0.00000000000000000  
M8: 0.00000000000000000  
M9: 0.00000000000000000  
N0: 0.00000000000000000  
N1: 0.00000000000000000  
N2: 0.00000000000000000  
N3: 0.00000000000000000  
N4: 0.00000000000000000  
N5: 0.00000000000000000  
N6: 0.00000000000000000  
N7: 0.00000000000000000  
N8: 0.00000000000000000  
N9: 0.00000000000000000  
O0: 0.00000000000000000  
O1: 0.00000000000000000  
O2: 0.00000000000000000  
O3: 0.00000000000000000  
O4: 0.00000000000000000  
O5: 0.00000000000000000  
O6: 0.00000000000000000  
O7: 0.00000000000000000  
O8: 0.00000000000000000  
O9: 0.00000000000000000  
P0: 0.00000000000000000  
P1: 0.00000000000000000  
P2: 0.00000000000000000  
P3: 0.00000000000000000  
P4: 0.00000000000000000  
P5: 0.00000000000000000  
P6: 0.00000000000000000  
P7: 0.00000000000000000  
P8: 0.00000000000000000  
P9: 0.00000000000000000  
Q0: 0.00000000000000000  
Q1: 0.00000000000000000  
Q2: 0.00000000000000000  
Q3: 0.00000000000000000  
Q4: 0.00000000000000000  
Q5: 0.00000000000000000  
Q6: 0.00000000000000000  
Q7: 0.00000000000000000  
Q8: 0.00000000000000000  
Q9: 0.00000000000000000  
R0: 0.00000000000000000  
R1: 0.00000000000000000  
R2: 0.00000000000000000  
R3: 0.00000000000000000  
R4: 0.00000000000000000  
R5: 0.00000000000000000  
R6: 0.00000000000000000  
R7: 0.00000000000000000  
R8: 0.00000000000000000  
R9: 0.00000000000000000  
S0: 0.00000000000000000  
S1: 0.00000000000000000  
S2: 0.00000000000000000  
S3: 0.00000000000000000  
S4: 0.00000000000000000  
S5: 0.00000000000000000  
S6: 0.00000000000000000  
S7: 0.00000000000000000  
S8: 0.00000000000000000  
S9: 0.00000000000000000  
T0: 0.00000000000000000  
T1: 0.00000000000000000  
T2: 0.00000000000000000  
T3: 0.00000000000000000  
T4: 0.00000000000000000  
T5: 0.00000000000000000  
T6: 0.00000000000000000  
T7: 0.00000000000000000  
T8: 0.00000000000000000  
T9: 0.00000000000000000  
U0: 0.00000000000000000  
U1: 0.00000000000000000  
U2: 0.00000000000000000  
U3: 0.00000000000000000  
U4: 0.00000000000000000  
U5: 0.00000000000000000  
U6: 0.00000000000000000  
U7: 0.00000000000000000  
U8: 0.00000000000000000  
U9: 0.00000000000000000  
V0: 0.00000000000000000  
V1: 0.00000000000000000  
V2: 0.00000000000000000  
V3: 0.00000000000000000  
V4: 0.00000000000000000  
V5: 0.00000000000000000  
V6: 0.00000000000000000  
V7: 0.00000000000000000  
V8: 0.00000000000000000  
V9: 0.00000000000000000  
W0: 0.00000000000000000  
W1: 0.00000000000000000  
W2: 0.00000000000000000  
W3: 0.00000000000000000  
W4: 0.00000000000000000  
W5: 0.00000000000000000  
W6: 0.00000000000000000  
W7: 0.00000000000000000  
W8: 0.00000000000000000  
W9: 0.00000000000000000  
X0: 0.00000000000000000  
X1: 0.00000000000000000  
X2: 0.00000000000000000  
X3: 0.00000000000000000  
X4: 0.00000000000000000  
X5: 0.00000000000000000  
X6: 0.00000000000000000  
X7: 0.00000000000000000  
X8: 0.00000000000000000  
X9: 0.00000000000000000  
Y0: 0.00000000000000000  
Y1: 0.00000000000000000  
Y2: 0.00000000000000000  
Y3: 0.00000000000000000  
Y4: 0.00000000000000000  
Y5: 0.00000000000000000  
Y6: 0.00000000000000000  
Y7: 0.00000000000000000  
Y8: 0.00000000000000000  
Y9: 0.00000000000000000  
Z0: 0.00000000000000000  
Z1: 0.00000000000000000  
Z2: 0.00000000000000000  
Z3: 0.00000000000000000  
Z4: 0.00000000000000000  
Z5: 0.00000000000000000  
Z6: 0.00000000000000000  
Z7: 0.00000000000000000  
Z8: 0.00000000000000000  
Z9: 0.00000000000000000

ABDUR RAUF/DR.BINA/PN/CDCL3  
noesy

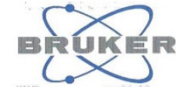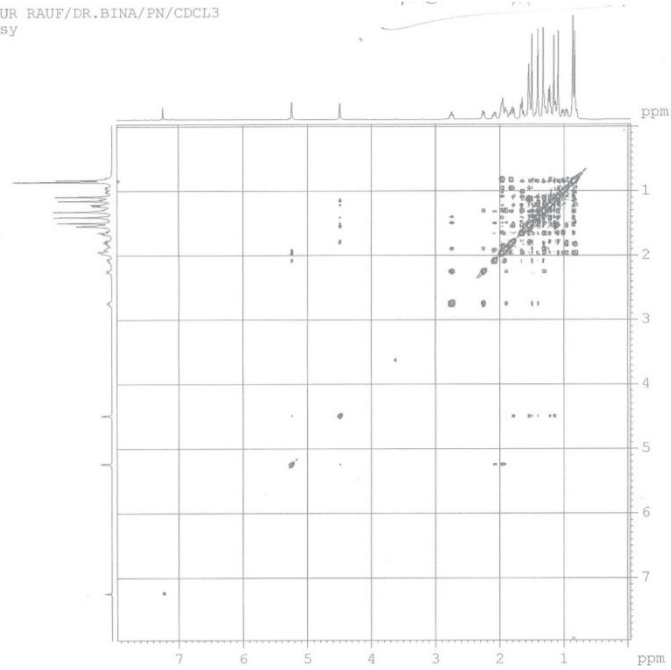

```

NAME          auj17-13
EXPNO         2
PROCNO        2
Date_         20130826
Time          15.51
INSTRUM       spect
PROBHD        5 mm PAXI 1H-
PULPROG       zgpg30
TD            65536
SOLVENT       CDCl3
NS            16
DS            4
SWH           4807.892 Hz
FIDRES        2.347504 Hz
AQ            0.2131460 sec
RG            512.5
DM            104.000 usec
DE            8.50 usec
TE            300.1 K
D0            0.0000445 sec
d1            1.0000000 sec
d8            0.0000001 sec
D16           0.00015000 sec
TD0           0.0002000 sec

----- CHANNEL f1 -----
NUC1          1H
P1            7.50 usec
PC            15.00 usec
PL1          0.00 dB
PL1W         14.56394111 W
SFO1         500.0334001 MHz

----- GRADIENT CHANNEL -----
GPMAG1        SINE.100
GPMAG2        SINE.100
GPC1          40.00 %
GPC2         -40.00 %
PL1           2000.00 usec
NUC2          1
TD            256
SFO2         600.0324 MHz
FIDRES        19.780046 Hz
SH            8.912 ppm
FAMODEL       State-TFPI
SI            1024
SF           600.030325 MHz
SFB           SINE
LB            0
GB            0
PC            4.00
SI            512
MC2           State-TFPI
SF           600.030325 MHz
SFB           SINE
LB            0
GB            0
  
```

ABDUR RAUF/DR. BINA/EN/CDCL3  
copy

AVANCE AV 500  
LAS. No. 100  
LA-1000

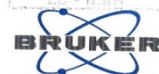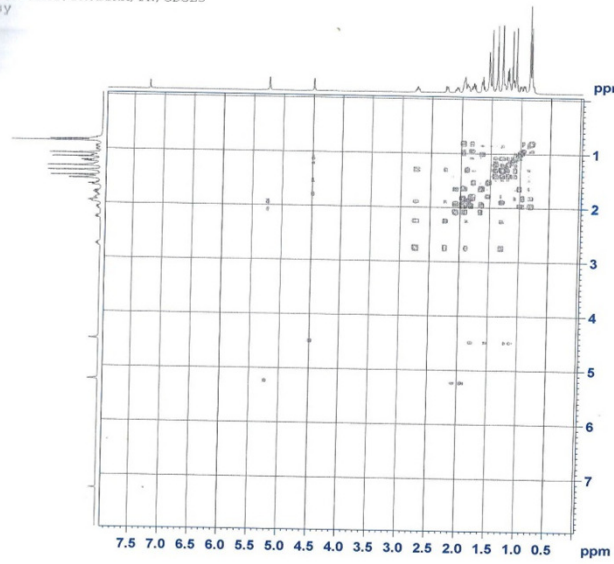

NAME: aag24-13  
 EXPNO: 2  
 PROCNO: 20130826  
 Date\_: 14.33  
 INSTRUM: spect  
 F2H0HD: 5 mm BBOH1 1H-  
 PULPROG: waltz16  
 TC: 2044  
 SOLVENT: CDCL3  
 NS: 8  
 DS: 4  
 SSB: 1807.632 Hz  
 FIDRES: 2.247596 Hz  
 AQ: 0.2131466 sec  
 RG: 90.5  
 DM: 104.000 usec  
 DE: 6.50 usec  
 TE: 300.2 K  
 D0: 0.0000300 sec  
 D1: 2.0000000 sec  
 D13: 0.0000400 sec  
 D23: 0.0000200 sec  
 INO: 0.0000000 sec

----- CHANNEL f1 -----  
 NUC1: 1H  
 P1: 7.50 usec  
 PL1: 0.00 dB  
 FWH: 14.56894112 Hz  
 SFO1: 600.0324001 MHz  
 NDC: 1  
 TD: 256  
 SFO1: 600.0324 MHz  
 FIDRES: 18.780046 Hz  
 DM: 8.012 usec  
 FWH00E: CF  
 SF: 1024  
 WCA: 600.0300255 MHz  
 ASB: QSINE  
 LB: 0  
 GB: 0.00 Hz  
 PC: 4.00  
 SI: 1624  
 MC2: CF  
 SF: 600.0300255 MHz  
 WCA: QSINE  
 ASB: 0  
 LB: 0.00 Hz  
 GB: 0



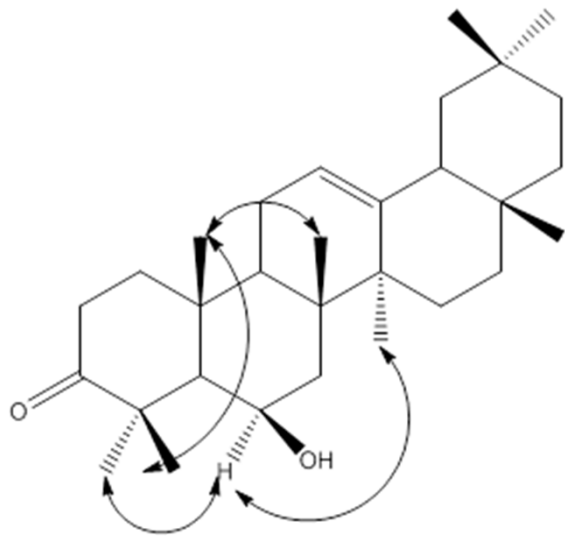

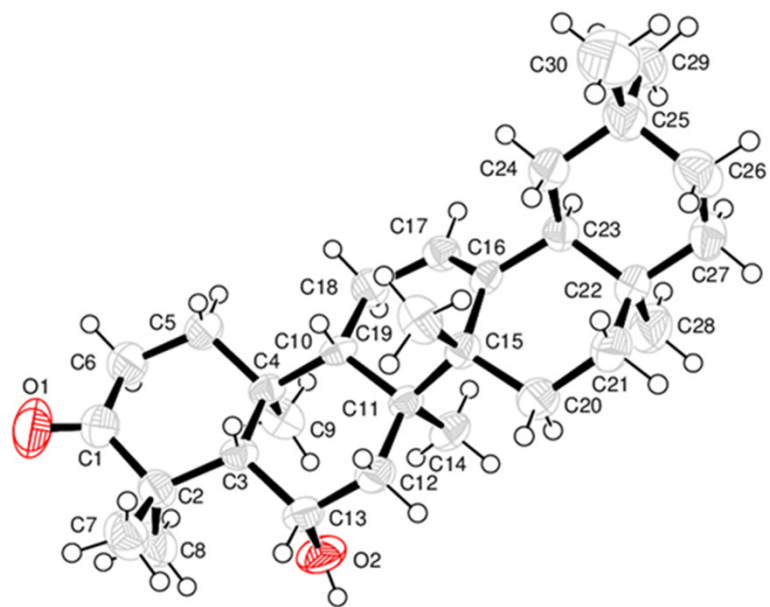

Supplement: f1 [file 4098686.f1.pdf]
